# Supplementary material
Source: publisher figshare collection journal article supplement (https://acs.figshare.com/ndownloader/files/5196040)
Supplement: Supplementary file 1 [file 5196040]

# CIF Copied by cif2cif, version 0.0.8 - beta ( 2 Apr 98)
data_global
_audit_creation_method 'maXus'
_publ_contact_author_name ' '
_publ_contact_author_address
;

;
_publ_contact_author_email ' '
_publ_contact_author_fax ' '
_publ_contact_author_phone ' '
_publ_section_title
;
ch2158
;
_publ_section_abstract
;
We present the crystal and molecular structure of
;
_publ_section_comment
;
The study of the titled structure was undertaken to establish its three
dimensional structure.  Geometries are tabulated below.  All diagrams and
calculations were performed using maXus (Bruker Nonius, Delft & MacScience,
Japan).
;
_publ_section_synopsis
;

;
_publ_section_exptl_prep
;

;
_publ_section_exptl_refinement
;

;
_publ_section_figure_captions
;

;
_publ_section_acknowledgements
;

;
_chemical_compound_source        'Local laboratory'
_exptl_crystal_description       'Cube'
_exptl_crystal_colour            'Colourless'
_cell_measurement_temperature     298
_refine_ls_hydrogen_treatment    'refxyz'


# Submission details
_publ_requested_journal 'Acta Crystallographica Section C '
_diffrn_measurement_device  'KappaCCD'
_computing_data_collection  'KappaCCD'
_computing_data_reduction  'Denzo and Scalepak (Otwinowski & Minor, 1997)'

_diffrn_radiation_source  'fine-focus sealed tube'
_diffrn_reflns_limit_h_min    -11
_diffrn_reflns_limit_h_max     11
_diffrn_reflns_limit_k_min    -16
_diffrn_reflns_limit_k_max     18
_diffrn_reflns_limit_l_min    -24
_diffrn_reflns_limit_l_max     24

loop_
  _diffrn_radiation_wavelength     0.71073
_diffrn_radiation_wavelength_id all


_diffrn_orient_matrix_type 'X=UH'
_diffrn_orient_matrix_UB_11   -0.05466
_diffrn_orient_matrix_UB_12   -0.06027
_diffrn_orient_matrix_UB_13   -0.05520
_diffrn_orient_matrix_UB_21    0.02734
_diffrn_orient_matrix_UB_22    0.02079
_diffrn_orient_matrix_UB_23   -0.04978
_diffrn_orient_matrix_UB_31    0.03079
_diffrn_orient_matrix_UB_32   -0.03314
_diffrn_orient_matrix_UB_33    0.00307

_cell_formula_units_Z     8
_exptl_crystal_density_diffrn    1.219
_exptl_crystal_density_method  'not measured'
_exptl_special_details
;
?
;
_chemical_formula_weight    340.423
_diffrn_radiation_type    ' MoK\a'

loop_
  _symmetry_equiv_pos_as_xyz
'+X,+Y,+Z'
'-X,+Y+ 1/2,-Z'

_symmetry_space_group_name_H-M 'P 21          '
_symmetry_cell_setting 'Monoclinic'
_chemical_formula_moiety 'C20 H24 N2 O3 '
_chemical_formula_sum    'C20 H24 N2 O3 '
_chemical_name_systematic
;
  ?
;
_cell_length_a           10.1762(2)
_cell_length_b           16.5343(4)
_cell_length_c           22.0690(7)
_cell_angle_alpha                90.00
_cell_angle_beta            91.8689(8)
_cell_angle_gamma                90.00
_cell_volume              3711.3(2)
_diffrn_reflns_number  23363
_diffrn_reflns_theta_max  23.45
_diffrn_reflns_theta_min   0.00
_diffrn_reflns_theta_full  23.45
_cell_measurement_reflns_used     16501
_cell_measurement_theta_min        4.076
_cell_measurement_theta_max        23.534
_diffrn_measurement_method       'CCD'
_computing_cell_refinement 'HKL Scalepack (Otwinowski & Minor 1997)'
_diffrn_reflns_av_R_equivalents   0.055
# Absorption correction

_exptl_absorpt_correction_type 'multi-scan'
_exptl_absorpt_correction_T_min  0.936
_exptl_absorpt_correction_T_max  0.994
_exptl_absorpt_process_details
;
multi-scan from symmetry-related measurements
  Sortav (Blessing 1995)
;
_exptl_absorpt_coefficient_mu     0.08
_exptl_crystal_F_000     1456

loop_
  _atom_type_symbol
  _atom_type_description
  _atom_type_scat_dispersion_real
  _atom_type_scat_dispersion_imag
  _atom_type_scat_source
'C '  'C '   0.0033   0.0016
  'Waasmaier & Kirfel, 1995'
'H '  'H '   0.0000   0.0000
  'Waasmaier & Kirfel, 1995'
'N '  'N '   0.0061   0.0033
  'Waasmaier & Kirfel, 1995'
'O '  'O '   0.0106   0.0060
  'Waasmaier & Kirfel, 1995'

# Refinement statistics
_reflns_d_resolution_low    1.56
_reflns_d_resolution_high    0.67
_reflns_limit_h_max   11
_reflns_limit_h_min    0
_reflns_limit_k_max   18
_reflns_limit_k_min    0
_reflns_limit_l_max   24
_reflns_limit_l_min  -24
_refine_ls_matrix_type  full
_refine_ls_shift/su_max   0.038
_refine_ls_shift/su_mean   0.005
_reflns_number_total    5983
_refine_ls_R_factor_all      0.085
_refine_ls_wR_factor_all     0.100
_refine_ls_goodness_of_fit_all   1.911
_reflns_number_gt    4307
_reflns_threshold_expression 'I> 3.00 sigma(I)'
_refine_ls_R_factor_gt   0.056
_refine_ls_wR_factor_gt   0.092
_refine_ls_goodness_of_fit_gt   1.906
_refine_ls_number_reflns    4233
_refine_ls_number_parameters     902
_refine_ls_number_restraints    0
_refine_ls_number_constraints  96
_refine_ls_wR_factor_ref   0.091
_refine_ls_goodness_of_fit_ref   1.870
_refine_ls_abs_structure_details
;
;
_refine_ls_structure_factor_coef  F^2^
_refine_special_details
;
  Refinement on F^2^.
;
_refine_ls_weighting_scheme  sigma
_refine_ls_weighting_details
; w = 1 / ( s^2^(Fo^2^) + 0.10000 * Fo^2^)
;
_refine_ls_extinction_method     Zachariasen
_refine_ls_extinction_expression
;
  equation(22) p292 'Crystallographic Computing' (1970)
  coefficient is multiplied by 10^4
;
_refine_ls_extinction_coef       8E5(3)
_computing_structure_refinement 'maXus(Mackay et al., 1999)'
_computing_molecular_graphics   'Ortep (Johnson, 1976)'
_computing_publication_material 'maXus(Mackay et al., 1999)'
_atom_sites_solution_hydrogens 'geom, diff'
_refine_diff_density_max       0.34
_refine_diff_density_min      -0.37
_refine_diff_density_rms       0.07
#==================================================

# ATOMIC COORDINATES AND THERMAL PARAMETERS

loop_
  _atom_site_label
  _atom_site_fract_x
  _atom_site_fract_y
  _atom_site_fract_z
  _atom_site_U_iso_or_equiv
  _atom_site_occupancy
  _atom_site_adp_type
  O1     0.5617(5)     0.4048(5)     0.5405(3)      0.106(4)       1.00 Uij
  O2     0.4225(4)     0.2637(3)     0.6448(2)      0.075(3)       1.00 Uij
  O3    -0.0141(5)     0.2983(4)     0.5584(3)      0.086(3)       1.00 Uij
  O4     0.3144(8)     0.4218(7)     0.1019(4)      0.146(7)       1.00 Uij
  O5     0.5360(4)     0.3794(3)     0.2106(2)      0.067(3)       1.00 Uij
  O6     0.2902(5)     0.4008(3)     0.3970(2)      0.071(3)       1.00 Uij
  O7    -0.1945(4)     0.2581(3)     0.3663(2)      0.069(3)       1.00 Uij
  O8     0.0448(4)     0.3726(3)     0.2844(2)      0.067(3)       1.00 Uij
  O9    -0.2187(4)     0.3507(3)     0.0972(2)      0.071(3)       1.00 Uij
  O10    0.0280(5)     0.3380(4)    -0.0607(3)      0.104(4)       1.00 Uij
  O11   -0.1270(5)     0.4934(3)    -0.1514(3)      0.083(3)       1.00 Uij
  O12   -0.5379(4)     0.4704(3)    -0.0528(2)      0.074(3)       1.00 Uij
  N1     0.3219(5)     0.3358(3)     0.5683(2)      0.055(3)       1.00 Uij
  N2     0.2085(5)     0.2861(3)     0.5723(3)      0.059(3)       1.00 Uij
  N3     0.3466(4)     0.4329(3)     0.2443(2)      0.048(3)       1.00 Uij
  N4     0.3627(5)     0.3904(3)     0.2998(2)      0.053(3)       1.00 Uij
  N5    -0.1492(4)     0.3185(3)     0.2503(2)      0.049(3)       1.00 Uij
  N6    -0.1396(5)     0.3626(3)     0.1946(2)      0.050(3)       1.00 Uij
  N7    -0.2117(5)     0.4190(3)    -0.0751(2)      0.054(3)       1.00 Uij
  N8    -0.3197(5)     0.4746(3)    -0.0728(3)      0.055(3)       1.00 Uij
  C1     0.6327(10)    0.3869(8)     0.6479(6)      0.130(8)       1.00 Uij
  C2     0.5558(7)     0.3548(6)     0.5942(4)      0.083(5)       1.00 Uij
  C3     0.6234(9)     0.3254(8)     0.5425(5)      0.112(7)       1.00 Uij
  C4     0.4268(6)     0.3169(4)     0.6064(3)      0.057(4)       1.00 Uij
  C5     0.2228(5)     0.2019(4)     0.5574(3)      0.054(3)       1.00 Uij
  C6     0.1654(6)     0.1449(5)     0.5931(3)      0.063(4)       1.00 Uij
  C7     0.1801(7)     0.0651(5)     0.5789(4)      0.073(4)       1.00 Uij
  C8     0.2522(7)     0.0414(5)     0.5303(4)      0.077(5)       1.00 Uij
  C9     0.3066(7)     0.0994(5)     0.4938(4)      0.080(5)       1.00 Uij
  C10    0.2922(6)     0.1795(5)     0.5081(4)      0.075(4)       1.00 Uij
  C11    0.0956(7)     0.3293(5)     0.5635(3)      0.061(4)       1.00 Uij
  C12    0.1322(6)     0.4166(5)     0.5604(3)      0.063(4)       1.00 Uij
  C13    0.2774(6)     0.4159(4)     0.5455(3)      0.057(4)       1.00 Uij
  C14    0.3304(8)     0.4953(5)     0.5737(3)      0.072(4)       1.00 Uij
  C15    0.2026(9)     0.5365(5)     0.5909(4)      0.078(5)       1.00 Uij
  C16    0.1180(9)     0.5543(6)     0.5331(4)      0.090(6)       1.00 Uij
  C17    0.0642(9)     0.4714(5)     0.5148(4)      0.086(5)       1.00 Uij
  C18    0.1261(8)     0.4670(5)     0.6202(3)      0.072(4)       1.00 Uij
  C19    0.1941(9)     0.4283(6)     0.6759(4)      0.088(5)       1.00 Uij
  C20   -0.0130(10)    0.4877(6)     0.6373(5)      0.105(6)       1.00 Uij
  C21    0.5333(7)     0.5004(5)     0.1140(3)      0.076(5)       1.00 Uij
  C22    0.4160(6)     0.4597(4)     0.1405(3)      0.052(3)       1.00 Uij
  C23    0.2901(4)     0.4978(3)     0.1285(2)      0.029(2)       1.00 Uij
  C24    0.4406(6)     0.4227(4)     0.2019(3)      0.052(3)       1.00 Uij
  C25    0.3800(6)     0.3041(4)     0.2997(3)      0.055(4)       1.00 Uij
  C26    0.3145(6)     0.2557(5)     0.2583(3)      0.064(4)       1.00 Uij
  C27    0.3307(8)     0.1732(5)     0.2612(4)      0.081(5)       1.00 Uij
  C28    0.4083(10)    0.1402(6)     0.3070(6)      0.098(7)       1.00 Uij
  C29    0.4747(9)     0.1883(7)     0.3472(5)      0.097(6)       1.00 Uij
  C30    0.4613(7)     0.2719(5)     0.3449(4)      0.076(5)       1.00 Uij
  C31    0.3036(6)     0.4301(5)     0.3470(3)      0.056(4)       1.00 Uij
  C32    0.2673(6)     0.5123(4)     0.3247(3)      0.054(3)       1.00 Uij
  C33    0.2626(5)     0.5054(4)     0.2555(3)      0.051(3)       1.00 Uij
  C34    0.3064(6)     0.5902(4)     0.2349(3)      0.059(4)       1.00 Uij
  C35    0.1683(7)     0.6425(5)     0.3171(3)      0.070(4)       1.00 Uij
  C36    0.1422(6)     0.5559(5)     0.3419(3)      0.064(4)       1.00 Uij
  C37    0.3095(7)     0.6382(4)     0.2949(3)      0.065(4)       1.00 Uij
  C38    0.3769(6)     0.5784(5)     0.3396(3)      0.062(4)       1.00 Uij
  C39    0.5160(6)     0.5556(5)     0.3244(4)      0.072(4)       1.00 Uij
  C40    0.3803(8)     0.6048(6)     0.4058(4)      0.086(5)       1.00 Uij
  C41    0.0493(8)     0.2520(6)     0.3827(4)      0.087(5)       1.00 Uij
  C42   -0.0694(6)     0.2938(4)     0.3553(3)      0.058(4)       1.00 Uij
  C43   -0.1614(9)     0.3360(6)     0.3928(4)      0.088(6)       1.00 Uij
  C44   -0.0503(6)     0.3292(4)     0.2929(3)      0.050(3)       1.00 Uij
  C45   -0.1249(5)     0.4471(4)     0.1957(3)      0.053(3)       1.00 Uij
  C46   -0.1915(7)     0.4945(5)     0.2369(4)      0.067(4)       1.00 Uij
  C47   -0.1794(9)     0.5771(5)     0.2334(5)      0.088(5)       1.00 Uij
  C48   -0.1037(11)    0.6137(6)     0.1914(6)      0.097(6)       1.00 Uij
  C49   -0.0356(9)     0.5670(7)     0.1524(5)      0.092(6)       1.00 Uij
  C50   -0.0458(7)     0.4837(5)     0.1535(4)      0.073(4)       1.00 Uij
  C51   -0.2021(5)     0.3220(4)     0.1469(3)      0.054(4)       1.00 Uij
  C52   -0.2328(5)     0.2400(4)     0.1687(3)      0.052(3)       1.00 Uij
  C53   -0.2313(5)     0.2462(4)     0.2383(3)      0.050(3)       1.00 Uij
  C54   -0.1857(6)     0.1623(5)     0.2594(3)      0.064(4)       1.00 Uij
  C55   -0.1878(7)     0.1155(5)     0.1996(4)      0.068(4)       1.00 Uij
  C56   -0.3325(7)     0.1104(5)     0.1762(4)      0.072(4)       1.00 Uij
  C57   -0.3610(6)     0.1964(5)     0.1503(3)      0.064(4)       1.00 Uij
  C58   -0.1265(6)     0.1741(5)     0.1549(3)      0.063(4)       1.00 Uij
  C59   -0.1288(8)     0.1464(6)     0.0894(4)      0.090(5)       1.00 Uij
  C60    0.0151(7)     0.1991(5)     0.1721(4)      0.078(4)       1.00 Uij
  C61    0.0592(10)    0.3618(7)    -0.1705(5)      0.119(7)       1.00 Uij
  C62    0.0072(7)     0.3896(5)    -0.1119(4)      0.082(5)       1.00 Uij
  C63    0.0976(9)     0.4132(7)    -0.0617(6)      0.107(7)       1.00 Uij
  C64   -0.1182(6)     0.4370(5)    -0.1166(3)      0.066(4)       1.00 Uij
  C65   -0.2896(6)     0.5560(4)    -0.0570(3)      0.050(3)       1.00 Uij
  C66   -0.3412(5)     0.6177(4)    -0.0922(3)      0.057(4)       1.00 Uij
  C67   -0.3102(7)     0.6954(5)    -0.0771(4)      0.072(4)       1.00 Uij
  C68   -0.2278(7)     0.7132(4)    -0.0291(4)      0.069(4)       1.00 Uij
  C69   -0.1778(7)     0.6524(6)     0.0061(4)      0.078(5)       1.00 Uij
  C70   -0.2089(7)     0.5730(5)    -0.0071(4)      0.071(4)       1.00 Uij
  C71   -0.4354(6)     0.4349(4)    -0.0618(3)      0.056(4)       1.00 Uij
  C72   -0.4075(6)     0.3476(4)    -0.0623(3)      0.053(3)       1.00 Uij
  C73   -0.2581(6)     0.3398(4)    -0.0528(3)      0.055(3)       1.00 Uij
  C74   -0.2261(8)     0.2601(5)    -0.0850(4)      0.079(5)       1.00 Uij
  C75   -0.3613(9)     0.2249(5)    -0.0985(4)      0.088(5)       1.00 Uij
  C76   -0.4252(9)     0.2065(5)    -0.0371(4)      0.088(5)       1.00 Uij
  C77   -0.4669(7)     0.2924(5)    -0.0143(3)      0.071(4)       1.00 Uij
  C78   -0.4396(8)     0.3000(6)    -0.1220(4)      0.079(5)       1.00 Uij
  C79   -0.3884(10)    0.3387(7)    -0.1797(3)      0.099(6)       1.00 Uij
  C80   -0.5876(10)    0.2842(8)    -0.1337(5)      0.122(8)       1.00 Uij
  H6     0.116460      0.162024      0.627343       0.068580       1.00 Uiso
  H7     0.1451(7)     0.0232(6)     0.6025(4)      0.078(4)       1.00 Uiso
  H8     0.2706(9)    -0.0148(8)     0.5237(5)      0.082(6)       1.00 Uiso
  H9     0.349294      0.083082      0.457677       0.085212       1.00 Uiso
  H10    0.331097      0.221015      0.484101       0.079752       1.00 Uiso
  H13    0.284644      0.417381      0.502222       0.061376       1.00 Uiso
  H15    0.213564      0.586439      0.612715       0.083361       1.00 Uiso
  H1A    0.573342      0.404228      0.678262       0.133764       1.00 Uiso
  H1B    0.687062      0.431478      0.636581       0.133764       1.00 Uiso
  H1C    0.686992      0.343918      0.663822       0.133764       1.00 Uiso
  H26    0.262351      0.281939      0.227079       0.069517       1.00 Uiso
  H27    0.284234      0.138421      0.232992       0.086221       1.00 Uiso
  H28    0.419498      0.082662      0.310371       0.103376       1.00 Uiso
  H29    0.531106      0.164563      0.378048       0.101472       1.00 Uiso
  H30    0.506745      0.306472      0.373540       0.080831       1.00 Uiso
  H33    0.173809      0.494725      0.241808       0.055812       1.00 Uiso
  H37    0.346628      0.691487      0.292670       0.070094       1.00 Uiso
  H3A    0.584450      0.292346      0.510951       0.121005       1.00 Uiso
  H3B    0.715842      0.331105      0.536086       0.121005       1.00 Uiso
  H46   -0.246677      0.470149      0.266236       0.071911       1.00 Uiso
  H47   -0.225675      0.611156      0.260782       0.093156       1.00 Uiso
  H48   -0.093280      0.671132      0.187745       0.101042       1.00 Uiso
  H49    0.016902      0.591642      0.122048       0.096929       1.00 Uiso
  H50    0.002983      0.449709      0.127031       0.078505       1.00 Uiso
  H53   -0.319359      0.255461      0.251006       0.055402       1.00 Uiso
  H55   -0.152374      0.061860      0.203093       0.072984       1.00 Uiso
  H66   -0.399898      0.605956     -0.126037       0.061411       1.00 Uiso
  H67   -0.345604      0.738579     -0.101720       0.077202       1.00 Uiso
  H68   -0.203588      0.768214     -0.020494       0.074050       1.00 Uiso
  H69   -0.123277      0.665320      0.041107       0.082370       1.00 Uiso
  H70   -0.172819      0.530031      0.017561       0.076172       1.00 Uiso
  H73   -0.237102      0.334592     -0.010202       0.059830       1.00 Uiso
  H75   -0.363116      0.177887     -0.124004       0.092878       1.00 Uiso
  H14A   0.387296      0.482283      0.607856       0.076968       1.00 Uiso
  H14B   0.379026      0.524623      0.544276       0.076968       1.00 Uiso
  H16A   0.047265      0.590482      0.541772       0.094936       1.00 Uiso
  H16B   0.171535      0.577842      0.502702       0.094936       1.00 Uiso
  H17A   0.091091      0.455406      0.475275       0.090340       1.00 Uiso
  H17B  -0.029499      0.466076      0.516985       0.090340       1.00 Uiso
  H19A   0.185125      0.463683      0.709978       0.093373       1.00 Uiso
  H19B   0.285665      0.420643      0.668368       0.093373       1.00 Uiso
  H19C   0.154445      0.377043      0.684348       0.093373       1.00 Uiso
  H20A  -0.009167      0.518795      0.674065       0.109973       1.00 Uiso
  H20B  -0.063138      0.439385      0.643445       0.109973       1.00 Uiso
  H20C  -0.054177      0.519195      0.605445       0.109973       1.00 Uiso
  H21A   0.551267      0.550204      0.137551       0.081131       1.00 Uiso
  H21B   0.501977      0.514874      0.083291       0.081131       1.00 Uiso
  H21C   0.611827      0.452074      0.106301       0.081131       1.00 Uiso
  H23A   0.270477      0.537657      0.097940       0.034258       1.00 Uiso
  H23B   0.217187      0.493127      0.154840       0.034258       1.00 Uiso
  H34A   0.391000      0.585738      0.217228       0.063772       1.00 Uiso
  H34B   0.243840      0.610748      0.205238       0.063772       1.00 Uiso
  H35A   0.105304      0.654789      0.285122       0.075315       1.00 Uiso
  H35B   0.159544      0.680639      0.349552       0.075315       1.00 Uiso
  H36A   0.068231      0.529246      0.322534       0.068690       1.00 Uiso
  H36B   0.135151      0.552666      0.385084       0.068690       1.00 Uiso
  H39A   0.574950      0.599368      0.334315       0.076607       1.00 Uiso
  H39B   0.518170      0.532738      0.280955       0.076607       1.00 Uiso
  H39C   0.540080      0.509048      0.348255       0.076607       1.00 Uiso
  H40A   0.446931      0.645144      0.412770       0.090920       1.00 Uiso
  H40B   0.399091      0.558604      0.430950       0.090920       1.00 Uiso
  H40C   0.296121      0.626684      0.415510       0.090920       1.00 Uiso
  H41A   0.127922      0.280576      0.372912       0.092083       1.00 Uiso
  H41B   0.085622      0.201226      0.357382       0.092083       1.00 Uiso
  H41C   0.041832      0.250076      0.425932       0.092083       1.00 Uiso
  H43A  -0.225828      0.374203      0.378098       0.093926       1.00 Uiso
  H43B  -0.163518      0.332943      0.436188       0.093926       1.00 Uiso
  H54A  -0.099206      0.166933      0.277797       0.069047       1.00 Uiso
  H54B  -0.244896      0.141163      0.288447       0.069047       1.00 Uiso
  H56A  -0.337681      0.071291      0.144030       0.076741       1.00 Uiso
  H56B  -0.390351      0.094741      0.207640       0.076741       1.00 Uiso
  H57A  -0.432838      0.221812      0.169945       0.069394       1.00 Uiso
  H57B  -0.375388      0.199242      0.107105       0.069394       1.00 Uiso
  H59A  -0.061937      0.106425      0.083709       0.094713       1.00 Uiso
  H59B  -0.113647      0.191905      0.063509       0.094713       1.00 Uiso
  H59C  -0.213487      0.123525      0.079479       0.094713       1.00 Uiso
  H60A   0.073247      0.155333      0.162938       0.083893       1.00 Uiso
  H60B   0.021867      0.210763      0.214708       0.083893       1.00 Uiso
  H60C   0.039107      0.246183      0.149548       0.083893       1.00 Uiso
  H61A   0.038831      0.402495     -0.200416       0.124854       1.00 Uiso
  H61B   0.016151      0.312175     -0.181846       0.124854       1.00 Uiso
  H61C   0.152571      0.353395     -0.167966       0.124854       1.00 Uiso
  H63A   0.076669      0.445329     -0.027074       0.111635       1.00 Uiso
  H63B   0.190209      0.401979     -0.060764       0.111635       1.00 Uiso
  H74A  -0.178851      0.271811     -0.120953       0.083781       1.00 Uiso
  H74B  -0.172901      0.226721     -0.058433       0.083781       1.00 Uiso
  H76A  -0.501108      0.173270     -0.045157       0.093105       1.00 Uiso
  H76B  -0.364148      0.178120     -0.010717       0.093105       1.00 Uiso
  H77A  -0.425450      0.304922      0.024302       0.076069       1.00 Uiso
  H77B  -0.559870      0.301632     -0.012408       0.076069       1.00 Uiso
  H79A  -0.411182      0.305634     -0.214195       0.103548       1.00 Uiso
  H79B  -0.294542      0.343684     -0.175775       0.103548       1.00 Uiso
  H79C  -0.426822      0.391384     -0.184985       0.103548       1.00 Uiso
  H80A  -0.599369      0.254770     -0.170954       0.125920       1.00 Uiso
  H80B  -0.631289      0.335520     -0.137224       0.125920       1.00 Uiso
  H80C  -0.624199      0.253810     -0.101224       0.125920       1.00 Uiso

_geom_special_details
;
All standard uncertainties (except dihedral angles between
l.s. planes) are estimated using the full covariance matrix.
The standard uncertainties in cell dimensions are are used in
calculating the standard uncertainties of bond distances,
angles and torsion angles. Angles between l.s. planes have
standard uncertainties calculated from atomic positional
standard uncertainties; the errors in cell dimensions are
not used in this case.
;

loop_
    _geom_bond_atom_site_label_1
    _geom_bond_atom_site_label_2
    _geom_bond_distance
    _geom_bond_site_symmetry_1
    _geom_bond_site_symmetry_2
    _geom_bond_publ_flag
  O1      C2             1.446(12) . . ?
  O1      C3             1.455(14) . . ?
  O2      C4              1.224(9) . . ?
  O3      C11             1.230(9) . . ?
  O4      C22            1.460(11) . . ?
  O4      C23            1.412(12) . . ?
  O5      C24             1.217(8) . . ?
  O6      C31             1.218(8) . . ?
  O7      C42             1.431(8) . . ?
  O7      C43            1.449(11) . . ?
  O8      C44             1.223(7) . . ?
  O9      C51             1.203(8) . . ?
  O10     C62            1.426(11) . . ?
  O10     C63            1.431(13) . . ?
  O11     C64            1.208(10) . . ?
  O12     C71             1.219(8) . . ?
  N1      N2              1.422(7) . . ?
  N1      C4              1.372(8) . . ?
  N1      C13             1.483(9) . . ?
  N2      C5              1.440(9) . . ?
  N2      C11             1.361(9) . . ?
  N3      N4              1.418(7) . . ?
  N3      C24             1.369(7) . . ?
  N3      C33             1.497(8) . . ?
  N4      C25             1.438(9) . . ?
  N4      C31             1.385(8) . . ?
  N5      N6              1.436(7) . . ?
  N5      C44             1.365(8) . . ?
  N5      C53             1.478(8) . . ?
  N6      C45             1.407(9) . . ?
  N6      C51             1.385(8) . . ?
  N7      N8              1.434(7) . . ?
  N7      C64             1.375(9) . . ?
  N7      C73             1.482(9) . . ?
  N8      C65             1.422(8) . . ?
  N8      C71             1.376(8) . . ?
  C1      C2               1.50(2) . . ?
  C2      C3             1.437(14) . . ?
  C2      C4             1.487(10) . . ?
  C5      C6             1.370(10) . . ?
  C5      C10            1.370(10) . . ?
  C6      C7             1.367(11) . . ?
  C7      C8             1.375(12) . . ?
  C8      C9             1.381(12) . . ?
  C9      C10            1.369(12) . . ?
  C11     C12            1.493(11) . . ?
  C12     C13             1.525(9) . . ?
  C12     C17            1.506(11) . . ?
  C12     C18            1.564(10) . . ?
  C13     C14            1.543(11) . . ?
  C14     C15            1.527(12) . . ?
  C15     C16            1.544(12) . . ?
  C15     C18            1.544(11) . . ?
  C16     C17            1.525(13) . . ?
  C18     C19            1.530(11) . . ?
  C18     C20            1.516(13) . . ?
  C21     C22            1.504(10) . . ?
  C22     C23             1.445(8) . . ?
  C22     C24             1.502(9) . . ?
  C25     C26            1.371(10) . . ?
  C25     C30            1.381(10) . . ?
  C26     C27            1.375(12) . . ?
  C27     C28            1.375(15) . . ?
  C28     C29              1.36(2) . . ?
  C29     C30            1.390(15) . . ?
  C31     C32            1.487(10) . . ?
  C32     C33             1.531(9) . . ?
  C32     C36             1.522(9) . . ?
  C32     C38            1.588(10) . . ?
  C33     C34             1.545(9) . . ?
  C34     C37            1.544(10) . . ?
  C35     C36            1.558(11) . . ?
  C35     C37            1.535(10) . . ?
  C37     C38            1.542(10) . . ?
  C38     C39             1.513(9) . . ?
  C38     C40            1.524(11) . . ?
  C41     C42            1.502(11) . . ?
  C42     C43            1.447(11) . . ?
  C42     C44             1.515(9) . . ?
  C45     C46            1.392(10) . . ?
  C45     C50            1.389(10) . . ?
  C46     C47            1.373(12) . . ?
  C47     C48              1.37(2) . . ?
  C48     C49              1.36(2) . . ?
  C49     C50            1.383(14) . . ?
  C51     C52            1.475(10) . . ?
  C52     C53             1.539(9) . . ?
  C52     C57             1.534(9) . . ?
  C52     C58             1.573(9) . . ?
  C53     C54            1.531(10) . . ?
  C54     C55            1.528(11) . . ?
  C55     C56            1.548(10) . . ?
  C55     C58            1.530(11) . . ?
  C56     C57            1.556(11) . . ?
  C58     C59            1.515(12) . . ?
  C58     C60            1.535(10) . . ?
  C61     C62            1.486(15) . . ?
  C62     C63            1.470(14) . . ?
  C62     C64            1.499(10) . . ?
  C65     C66             1.376(9) . . ?
  C65     C70            1.382(10) . . ?
  C66     C67            1.362(11) . . ?
  C67     C68            1.360(11) . . ?
  C68     C69            1.359(12) . . ?
  C69     C70            1.380(12) . . ?
  C71     C72            1.473(10) . . ?
  C72     C73             1.534(9) . . ?
  C72     C77            1.538(10) . . ?
  C72     C78            1.560(10) . . ?
  C73     C74            1.538(11) . . ?
  C74     C75            1.515(12) . . ?
  C75     C76            1.551(13) . . ?
  C75     C78            1.555(13) . . ?
  C76     C77            1.571(12) . . ?
  C78     C79            1.531(12) . . ?
  C78     C80            1.541(13) . . ?
  C21     H21C            1.146(8) . . ?


loop_
   _geom_angle_atom_site_label_1
   _geom_angle_atom_site_label_2
   _geom_angle_atom_site_label_3
   _geom_angle
   _geom_angle_site_symmetry_1
   _geom_angle_site_symmetry_2
   _geom_angle_site_symmetry_3
   _geom_angle_publ_flag
   C2      O1      C3                    59.3(6)  . . . ?
   C22     O4      C23                   60.4(5)  . . . ?
   C42     O7      C43                   60.3(5)  . . . ?
   C62     O10     C63                   61.9(6)  . . . ?
   N2      N1      C4                   116.6(5)  . . . ?
   N2      N1      C13                  107.3(4)  . . . ?
   C4      N1      C13                  129.3(6)  . . . ?
   N1      N2      C5                   117.1(5)  . . . ?
   N1      N2      C11                  111.8(5)  . . . ?
   C5      N2      C11                  124.5(5)  . . . ?
   N4      N3      C24                  117.7(5)  . . . ?
   N4      N3      C33                  107.7(4)  . . . ?
   C24     N3      C33                  128.8(5)  . . . ?
   N3      N4      C25                  120.1(5)  . . . ?
   N3      N4      C31                  111.9(5)  . . . ?
   C25     N4      C31                  121.9(5)  . . . ?
   N6      N5      C44                  117.0(5)  . . . ?
   N6      N5      C53                  108.0(4)  . . . ?
   C44     N5      C53                  129.0(5)  . . . ?
   N5      N6      C45                  119.9(5)  . . . ?
   N5      N6      C51                  111.3(5)  . . . ?
   C45     N6      C51                  122.8(5)  . . . ?
   N8      N7      C64                  115.6(5)  . . . ?
   N8      N7      C73                  107.5(4)  . . . ?
   C64     N7      C73                  130.4(6)  . . . ?
   N7      N8      C65                  117.1(4)  . . . ?
   N7      N8      C71                  111.2(5)  . . . ?
   C65     N8      C71                  125.9(5)  . . . ?
   O1      C2      C1                   114.3(8)  . . . ?
   O1      C2      C3                    60.6(7)  . . . ?
   O1      C2      C4                   116.7(6)  . . . ?
   C1      C2      C3                   119.9(8)  . . . ?
   C1      C2      C4                   116.6(8)  . . . ?
   C3      C2      C4                   116.7(8)  . . . ?
   O1      C3      C2                    60.0(6)  . . . ?
   O2      C4      N1                   122.8(6)  . . . ?
   O2      C4      C2                   118.7(6)  . . . ?
   N1      C4      C2                   117.9(6)  . . . ?
   N2      C5      C6                   119.0(6)  . . . ?
   N2      C5      C10                  120.2(6)  . . . ?
   C6      C5      C10                  120.8(7)  . . . ?
   C5      C6      C7                   118.7(7)  . . . ?
   C6      C7      C8                   121.3(7)  . . . ?
   C7      C8      C9                   119.4(7)  . . . ?
   C8      C9      C10                  119.4(8)  . . . ?
   C5      C10     C9                   120.4(7)  . . . ?
   O3      C11     N2                   123.6(7)  . . . ?
   O3      C11     C12                  128.7(7)  . . . ?
   N2      C11     C12                  107.6(6)  . . . ?
   C11     C12     C13                  104.3(6)  . . . ?
   C11     C12     C17                  120.2(6)  . . . ?
   C11     C12     C18                  117.3(6)  . . . ?
   C13     C12     C17                  106.7(6)  . . . ?
   C13     C12     C18                  104.6(6)  . . . ?
   C17     C12     C18                  102.3(6)  . . . ?
   N1      C13     C12                  102.8(5)  . . . ?
   N1      C13     C14                  121.6(5)  . . . ?
   C12     C13     C14                  103.6(6)  . . . ?
   C13     C14     C15                  101.0(6)  . . . ?
   C14     C15     C16                  109.6(7)  . . . ?
   C14     C15     C18                  102.5(6)  . . . ?
   C16     C15     C18                  102.3(7)  . . . ?
   C15     C16     C17                  103.5(7)  . . . ?
   C12     C17     C16                  102.2(7)  . . . ?
   C12     C18     C15                   90.5(6)  . . . ?
   C12     C18     C19                  115.2(6)  . . . ?
   C12     C18     C20                  113.2(7)  . . . ?
   C15     C18     C19                  115.3(7)  . . . ?
   C15     C18     C20                  115.1(7)  . . . ?
   C19     C18     C20                  107.3(7)  . . . ?
   O4      C22     C21                  121.4(6)  . . . ?
   O4      C22     C23                   58.2(5)  . . . ?
   O4      C22     C24                  116.5(6)  . . . ?
   C21     C22     C23                  116.4(6)  . . . ?
   C21     C22     C24                  115.0(5)  . . . ?
   C23     C22     C24                  117.6(5)  . . . ?
   O4      C23     C22                   61.4(5)  . . . ?
   O5      C24     N3                   122.5(6)  . . . ?
   O5      C24     C22                  119.3(5)  . . . ?
   N3      C24     C22                  117.8(5)  . . . ?
   N4      C25     C26                  121.5(6)  . . . ?
   N4      C25     C30                  116.9(6)  . . . ?
   C26     C25     C30                  121.5(7)  . . . ?
   C25     C26     C27                  119.6(7)  . . . ?
   C26     C27     C28                  119.5(8)  . . . ?
   C27     C28     C29                 120.7(10)  . . . ?
   C28     C29     C30                  120.9(9)  . . . ?
   C25     C30     C29                  117.7(8)  . . . ?
   O6      C31     N4                   123.8(7)  . . . ?
   O6      C31     C32                  129.0(6)  . . . ?
   N4      C31     C32                  107.1(5)  . . . ?
   C31     C32     C33                  105.1(5)  . . . ?
   C31     C32     C36                  123.5(6)  . . . ?
   C31     C32     C38                  113.3(5)  . . . ?
   C33     C32     C36                  106.5(5)  . . . ?
   C33     C32     C38                  104.9(5)  . . . ?
   C36     C32     C38                  102.1(5)  . . . ?
   N3      C33     C32                  103.0(5)  . . . ?
   N3      C33     C34                  120.5(5)  . . . ?
   C32     C33     C34                  103.0(5)  . . . ?
   C33     C34     C37                  102.3(5)  . . . ?
   C36     C35     C37                  104.0(6)  . . . ?
   C32     C36     C35                  101.2(5)  . . . ?
   C34     C37     C35                  107.7(6)  . . . ?
   C34     C37     C38                  102.4(6)  . . . ?
   C35     C37     C38                  103.1(6)  . . . ?
   C32     C38     C37                   90.8(5)  . . . ?
   C32     C38     C39                  116.0(6)  . . . ?
   C32     C38     C40                  112.9(6)  . . . ?
   C37     C38     C39                  114.7(6)  . . . ?
   C37     C38     C40                  115.1(6)  . . . ?
   C39     C38     C40                  107.0(6)  . . . ?
   O7      C42     C41                  116.7(6)  . . . ?
   O7      C42     C43                   60.4(5)  . . . ?
   O7      C42     C44                  117.1(5)  . . . ?
   C41     C42     C43                  121.2(6)  . . . ?
   C41     C42     C44                  114.8(6)  . . . ?
   C43     C42     C44                  116.0(6)  . . . ?
   O7      C43     C42                   59.2(5)  . . . ?
   O8      C44     N5                   122.7(6)  . . . ?
   O8      C44     C42                  119.4(5)  . . . ?
   N5      C44     C42                  117.5(5)  . . . ?
   N6      C45     C46                  121.2(6)  . . . ?
   N6      C45     C50                  118.9(6)  . . . ?
   C46     C45     C50                  119.9(7)  . . . ?
   C45     C46     C47                  118.5(7)  . . . ?
   C46     C47     C48                  122.1(9)  . . . ?
   C47     C48     C49                  119.3(9)  . . . ?
   C48     C49     C50                  120.8(9)  . . . ?
   C45     C50     C49                  119.4(8)  . . . ?
   O9      C51     N6                   123.3(6)  . . . ?
   O9      C51     C52                  129.4(6)  . . . ?
   N6      C51     C52                  107.1(5)  . . . ?
   C51     C52     C53                  105.6(5)  . . . ?
   C51     C52     C57                  122.2(5)  . . . ?
   C51     C52     C58                  114.8(5)  . . . ?
   C53     C52     C57                  106.0(5)  . . . ?
   C53     C52     C58                  104.7(5)  . . . ?
   C57     C52     C58                  102.0(5)  . . . ?
   N5      C53     C52                  102.8(5)  . . . ?
   N5      C53     C54                  120.9(5)  . . . ?
   C52     C53     C54                  103.7(5)  . . . ?
   C53     C54     C55                  101.5(6)  . . . ?
   C54     C55     C56                  107.6(6)  . . . ?
   C54     C55     C58                  104.1(6)  . . . ?
   C56     C55     C58                  102.9(6)  . . . ?
   C55     C56     C57                  103.6(6)  . . . ?
   C52     C57     C56                  100.7(5)  . . . ?
   C52     C58     C55                   90.9(5)  . . . ?
   C52     C58     C59                  113.8(6)  . . . ?
   C52     C58     C60                  114.3(6)  . . . ?
   C55     C58     C59                  115.5(7)  . . . ?
   C55     C58     C60                  114.2(6)  . . . ?
   C59     C58     C60                  107.6(6)  . . . ?
   O10     C62     C61                  117.2(8)  . . . ?
   O10     C62     C63                   59.2(6)  . . . ?
   O10     C62     C64                  118.2(7)  . . . ?
   C61     C62     C63                  120.4(8)  . . . ?
   C61     C62     C64                  115.3(8)  . . . ?
   C63     C62     C64                  115.1(8)  . . . ?
   O10     C63     C62                   58.9(6)  . . . ?
   O11     C64     N7                   123.5(6)  . . . ?
   O11     C64     C62                  119.5(7)  . . . ?
   N7      C64     C62                  116.5(7)  . . . ?
   N8      C65     C66                  119.2(6)  . . . ?
   N8      C65     C70                  120.3(6)  . . . ?
   C66     C65     C70                  120.4(6)  . . . ?
   C65     C66     C67                  118.6(6)  . . . ?
   C66     C67     C68                  121.8(7)  . . . ?
   C67     C68     C69                  119.7(7)  . . . ?
   C68     C69     C70                  120.3(7)  . . . ?
   C65     C70     C69                  119.2(7)  . . . ?
   O12     C71     N8                   122.8(6)  . . . ?
   O12     C71     C72                  129.8(6)  . . . ?
   N8      C71     C72                  107.5(5)  . . . ?
   C71     C72     C73                  105.7(5)  . . . ?
   C71     C72     C77                  119.8(6)  . . . ?
   C71     C72     C78                  117.8(6)  . . . ?
   C73     C72     C77                  105.4(5)  . . . ?
   C73     C72     C78                  104.7(5)  . . . ?
   C77     C72     C78                  102.0(6)  . . . ?
   N7      C73     C72                  101.9(5)  . . . ?
   N7      C73     C74                  121.9(6)  . . . ?
   C72     C73     C74                  103.4(5)  . . . ?
   C73     C74     C75                  102.4(6)  . . . ?
   C74     C75     C76                  108.0(7)  . . . ?
   C74     C75     C78                  102.2(7)  . . . ?
   C76     C75     C78                  102.9(7)  . . . ?
   C75     C76     C77                  103.2(7)  . . . ?
   C72     C77     C76                  101.4(6)  . . . ?
   C72     C78     C75                   91.7(6)  . . . ?
   C72     C78     C79                  115.1(7)  . . . ?
   C72     C78     C80                  113.8(7)  . . . ?
   C75     C78     C79                  115.3(7)  . . . ?
   C75     C78     C80                  114.1(8)  . . . ?
   C79     C78     C80                  106.8(7)  . . . ?
   C22     C21     H21C                 108.1(7)  . . . ?

#===================================================


_publ_section_references
;
Mackay, S., Gilmore, C. J.,Edwards, C., Stewart, N. & Shankland, K.
(1999). maXus  Computer Program for the Solution and Refinement of
Crystal Structures. Bruker Nonius, The Netherlands, MacScience, Japan
& The University of Glasgow.

Johnson, C. K. (1976). ORTEP-II. A Fortran Thermal-Ellipsoid Plot
Program. Report ORNL-5138. Oak Ridge National Laboratory, Oak Ridge,
Tennessee, USA.

Otwinowski, Z. and Minor, W, (1997). In Methods in Enzymology, 276,
edited by C.W. Carter, Jr. & R.M. Sweet pp. 307-326,
New York:Academic Press.

Altomare, A., Burla, M.C., Camalli, M., Cascarano, G.L.,
Giacovazzo, C., Guagliardi, A., Moliterni, A.G.G & Spagna, R.
(1999). J. Appl. Cryst. 32, 115-119.

Waasmaier, D. & Kirfel, A. (1995). Acta Cryst. A51, 416-431.

Blessing, R.H. (1995), Acta. Cryst. A51, 33-38.

;
